# Supplementary material
Source: publisher site journal article supplement (https://www.dovepress.com/get_supplementary_file.php?f=313486.docx)
Supplement: Supplementary file 1 [file get_supplementary_file.php]

**Identification of a Vulnerable Group for Post-Acute Sequelae of SARS-CoV-2 (PASC): People with autoimmune diseases recover more slowly from COVID-19.**

**Author names:** Nancy A Dreyer, PhD1; Natalia Petruski-Ivleva, PhD1; Lisa Albert, PhD1; Damir Mohamed, MSc2; Emma Brinkley, MS,1 Matthew Reynolds, PhD1, Stephen Toovey MD3

**Affiliations:**

1Real World Solutions, IQVIA Cambridge, Massachusetts, USA

2Real World Solutions, IQVIA Courbevoie, France

3 Pegasus Research, Switzerland.

**Corresponding Author:**

Nancy A Dreyer, PhD, MPH, FISPE, Fellow DIA

Chief Scientific Officer and Senior Vice President at IQVIA

201 Broadway, 5th floor

Cambridge, MA 02139 USA

Phone: +1 617 733 9478

E-mail: [Nancy.Dreyer@IQVIA.com](mailto:Nancy.Dreyer@IQVIA.com)

**Supplemental materials**

Table S1. Unadjusted risk of more severe COVID-19 presentation and persistent symptoms among participants reporting use of medications for autoimmune disease compared to those reporting not taking medications.

|  | At enrollment | | Around day 30 after enrollment* | | |
| --- | --- | --- | --- | --- | --- |
|  | ≥7 symptoms** | ≥11 severity** score | ≥3 symptoms*** | Shortness of breath | Fatigue |
| **Unadjusted* OR (95%CI)** |  |  |  |  |  |
| Age 30-39 vs 18-29 | 1.35 (0.99; 1.83) | 1.22 (0.90; 1.66) | 1.78 (1.10; 2.90) | 0.81 (0.42; 1.55) | 2.10 (1.3; 3.37) |
| Age 40-49 vs 18-29 | 1.57 (1.15; 2.14) | 1.64 (1.20; 2.23) | 2.22 (1.38; 3.59) | 1.66 (0.92; 3.01) | 2.17 (1.35; 3.48) |
| Age 50-59 vs 18-29 | 1.55 (1.09; 2.19) | 1.26 (0.89; 1.78) | 2.36 (1.42; 3.94) | 1.07 (0.54; 2.10) | 3.21 (1.95; 5.29) |
| Age 60+ vs 18-29 | 0.75 (0.49; 1.17) | 0.59 (0.38; 0.94) | 2.24 (1.2; 4.18) | 0.67 (0.25; 1.78) | 2.03 (1.09; 3.78) |
| Gender other than Female | 0.48 (0.35; 0.65) | 0.44 (0.32; 0.61) | 0.50 (0.31; 0.80) | 0.29 (0.12; 0.72) | 0.43 (0.26; 0.69) |
| Race other than White | 0.83 (0.65; 1.06) | 0.70 (0.55; 0.9) | 0.74 (0.51; 1.07) | 0.49 (0.26; 0.91) | 0.86 (0.60; 1.22) |
| Ethnicity Hispanic/Latino | 0.91 (0.69; 1.20) | 0.99 (0.75; 1.31) | 0.88 (0.59; 1.31) | 0.76 (0.42; 1.37) | 1.00 (0.68; 1.46) |
| BMI overweight vs normal | 1.34 (1.00; 1.79) | 1.27 (0.95; 1.69) | 1.71 (1.13; 2.59) | 1.14 (0.63; 2.06) | 1.24 (0.83; 1.85) |
| BMI obese vs normal | 2.02 (1.57; 2.61) | 2.20 (1.70; 2.85) | 1.79 (1.23; 2.61) | 1.41 (0.84; 2.35) | 1.70 (1.19; 2.42) |
| Education high school or less vs college | 2.16 (1.54; 3.03) | 1.77 (1.26; 2.47) | 1.27 (0.81; 2.00) | 1.55 (0.77; 3.12) | 1.25 (0.79; 1.96) |
| Education some college vs college | 1.83 (1.39; 2.39) | 1.59 (1.22; 2.08) | 1.28 (0.90; 1.83) | 1.31 (0.69; 2.50) | 1.41 (0.99; 2.01) |
| Education more than college vs college | 1.23 (0.90; 1.67) | 0.98 (0.72; 1.34) | 0.90 (0.60; 1.36) | 2.26 (1.31; 3.91) | 1.26 (0.84; 1.86) |
| Smoker yes vs no | 1.64 (1.17; 2.29) | 1.52 (1.09; 2.11) | 1.35 (0.85; 2.15) | 1.59 (0.88; 2.89) | 0.93 (0.58; 1.49) |
| Cardiovascular disease | 1.34 (0.79; 2.30) | 1.5 (0.87; 2.57) | 1.27 (0.64; 2.52) | 1.42 (0.58; 3.48) | 1.55 (0.80; 2.97) |
| Taking medications for diabetes | 1.27 (0.84; 1.90) | 0.95 (0.63; 1.42) | 1.22 (0.72; 2.07) | 1.36 (0.67; 2.74) | 1.13 (0.67; 1.92) |
| Taking medications for hypertension | 1.57 (1.19; 2.05) | 1.36 (1.04; 1.77) | 1.81 (1.27; 2.59) | 1.57 (0.97; 2.54) | 1.39 (0.97; 1.99) |
| Taking medications for lung disease | 2.60 (1.65; 4.10) | 2.31 (1.49; 3.58) | 2.35 (1.42; 3.88) | 3.04 (1.71; 5.43) | 2.31 (1.40; 3.80) |
| Number of symptoms at enrollment | n/a | n/a | 1.24 (1.18; 1.30) | 1.19 (1.12; 1.27) | 1.20 (1.15; 1.26) |

Abbreviations: OR, odds ratios; CI, confidence interval

*Around day 30 includes a range of 25-45 days after enrollment, with a median [IQR] time of 30 [28;42]

**Median in the overall population was used for the cutoff

***75th percentile in the overall population was used for the cutoff
